# Supplementary material for: Psychological impact of injuries sustained in motor vehicle crashes: systematic review and meta-analysis
Source: PubMed Central journal article supplement — BMJ Open. 2016 Sep 8;6(9):e011993. doi: 10.1136/bmjopen-2016-011993 (PMC5020848; doi:10.1136/bmjopen-2016-011993), 2016-09-08
Supplement: bmjopen-2016-011993supp1.pdf [file bmjopen-2016-011993supp1.pdf]

## **Search Strategy for mTBI**

**SEARCH TERM** -Stress Disorders, Post-Traumatic/ or Middle Aged/ or Accidents, Traffic/ or "Wounds and Injuries"/ or Motor vehicle accident\*.mp. or Cognition Disorders/ or Adult/Motorcycles/ or Automobile Driving/ or Middle Aged/ or Automobiles/ or Adult/ or Adolescent/ or "Wounds and Injuries"/ or Accidents, Traffic/ or road traffic crash\*.mp. or Safety/psychological injur\*.mp. or Depression/ or Time Factors/ or Brain Injuries/ or Social Work/ or Counseling/ or Psychology/Adult/ or Antisocial Personality Disorder/ or Adolescent/ or psychopath\*.mp. or Homicide/ Depression/ or Community Mental Health Services/ or Depressive Disorder/ or Middle Aged/ or Mental Health/ or Stress Disorders, Post-Traumatic/ or Mental Health Services/ or Adult/ or Mental Disorders/ or mental health\*.mp. or Adolescent/Manifest Anxiety Scale/ or Test Anxiety Scale/ or Anxiety/ or Anxiety Disorders/ or Anxiety.mp. or Anxiety, Castration/Adjustment Disorders/px, rh [Psychology, Rehabilitation] Brain Injuries/ or brain inj\*.mp.1 or 2  
Post-Concussion Syndrome/ or Brain Concussion/ or Concussion\*.mp.  
Brain Injuries/ or head inj\*.mp.  
8 or 10 or 11  
3 or 4 or 5 or 6 or 7  
9 and 12 and 13

**SEARCH DATE: 16 June 2014**

**Databases searched: Cochrane, ISI Web, Scopus, Google Scholar**
