# Supplementary material for: Psychological impact of injuries sustained in motor vehicle crashes: systematic review and meta-analysis
Source: PubMed Central journal article supplement — BMJ Open. 2016 Sep 8;6(9):e011993. doi: 10.1136/bmjopen-2016-011993 (PMC5020848; doi:10.1136/bmjopen-2016-011993), 2016-09-08
Supplement: bmjopen-2016-011993supp2.pdf [file bmjopen-2016-011993supp2.pdf]

## SCI excluded papers

1. Koca I, Isik M, Karakus V, et al. The burden on caregivers and affecting factors in patients with spinal cord injuries, Spinal Kord Yaralanmalı Hastalarda Bakım Verenlerin Yuku ve Etkileyen Faktorler. [Turkish, English]. *Turkiye Fiziksel Tip ve Rehabilitasyon Dergisi* 2013; 59:392.
2. Jensen TS. (2012). High prevalence of posttraumatic stress disorder (PTSD) and pain sensitization in two Scandinavian samples of patients referred for pain rehabilitation. *Scandinavian J Pain* 2012; 3:38.
3. Pachalska M, Ziolkowska M. Individual happiness in terms of process neuropsychology. *Acta Neuropsychol* 2011; 9:19-30.
4. Fichtenberg NL, Zafonte RD, Putnam S, Mann NR, Millard A. Insomnia in a post-acute brain injury sample. *Brain Injury* 2002; 16:197-206.
5. Ghazwin MY, Chaibakhsh S, Latifi S, Tavakoli AH, Koushki D. Quality of life in Iranian men with spinal cord injury in comparison with general population. *Arch Neuroscience* 2015; 2(2)
6. Quale AJ, Schanke AK, Froslied KF, Roise O. Severity of injury does not have any impact on posttraumatic stress symptoms in severely injured patients. *Injury* 2009; 40:498-505.
7. Adkins RH, Hume B, Nabor M, Waters RL. Spinal cord injury identified with violence: Community reintegration in urban areas. *Top Spinal Cord Injury Rehabil* 1998; 4:18-27.
8. Hatcher MB, Whitaker C, Karl A. What predicts post-traumatic stress following spinal cord injury? *Brit J Health Psychol* 2009; 14: 541-561.
9. Cuff L, Fann J, Bombardier C, Graves D, Kalpakjian C. Depression, pain intensity, and interference in acute spinal cord injury. *Top Spinal Cord Injury Rehabil* 2014; 20: 32-39.
10. Nielsen MS. Crisis support and coping as mediators of well-being in persons with spinal cord lesion. *J Clin Psychol Med Settings* 2003; 10:91-99.

## mTBI excluded papers

11. Bryant RA, Harvey AG. Initial posttraumatic stress responses following motor vehicle accidents. *J Traum Stress* 1996; 9: 223-234.
12. Creamer M, O'Donnell ML, Pattison P. Amnesia, traumatic brain injury, and posttraumatic stress disorder: a methodological inquiry. *Behav Res Therapy* 2005; 43:1383-1389.
13. De Mol J, Genaux J. Rorschach test and post-traumatic depressive syndromes. *Acta Psychiatrica Belgica* 1987; 87:676-687.
14. Dean PJ, O'Neill D, Sterr A. Post-concussion syndrome: prevalence after mild traumatic brain injury in comparison with a sample without head injury. *Brain Inj* 2012; 26: 14-26.
15. Fodor KE, Perczel Forintos D. Posttraumatic stress symptoms, dysfunctional attitudes and ways of coping in a clinical sample of PTSD patients. *Psychiatria Hungarica* 2013; 28:5-12.

16. Haagsma JA, Ringburg AN, van Lieshout EM, et al. Prevalence rate, predictors and long-term course of probable posttraumatic stress disorder after major trauma: a prospective cohort study. *BMC Psychiatry* 2012; 12:236.
17. Holbrook TL, Anderson JP, Sieber WJ, Browner D, Hoyt DB. Outcome after major trauma: 12-month and 18-month follow-up results from the Trauma Recovery Project. *J Trauma-Inj Infect Crit Care* 1999; 46:765-771.
18. Jenewein J, Moergeli H, Wittmann L, Buchi S, Kraemer B, Schnyder U. (2009). Development of chronic pain following severe accidental injury. Results of a 3-year follow-up study. *J Psychosom Res* 2009; 66:119-126.
19. Jones C, Harvey AG, Brewin CR. The organisation and content of trauma memories in survivors of road traffic accidents. *Behaviour Research & Therapy* 2007; 45:151-162.
20. Mayou RA, Black J, Bryant B. Unconsciousness, amnesia and psychiatric symptoms following road traffic accident injury. *Brit J Psychiatry* 2000; 177:540-545.
21. Meares S, Shores EA, Taylor AJ, et al. Mild traumatic brain injury does not predict acute postconcussion syndrome. *J Neurol, Neurosurgery Psychiatry* 2008; 79:300-306.
22. Myhren H, Ekeberg O, Toien K, Karlsson S, Stokland O. Posttraumatic stress, anxiety and depression symptoms in patients during the first year post intensive care unit discharge. *Crit Care* 2010; 14:R14.
23. Hickling EJ, Gillen R, Blanchard EB, Buckley T, Taylor A. Traumatic brain injury and posttraumatic stress disorder: a preliminary investigation of neuropsychological test results in PTSD secondary to motor vehicle accidents. *Brain Injury* 1998; 12:265-274.

#### WAD Excluded papers

24. Bosma FK, Kessels RP. Cognitive impairments, psychological dysfunction, and coping styles in patients with chronic whiplash syndrome. *Cogn Behav Neurology* 2002; 15:56-65.
25. Merrick D, Stålnacke BM. Five years post whiplash injury: Symptoms and psychological factors in recovered versus non-recovered. *BMC Research Notes* 2010; 3:1.
26. Myrtveit SM, Skogen JC, Wenzel HG, Mykletun A. Somatic symptoms beyond those generally associated with a whiplash injury are increased in self-reported chronic whiplash. A population-based cross sectional study: the Hordaland Health Study (HUSK). *BMC Psychiatry* 2012; 12:1.
27. Peebles JE, McWilliams LA, MacLennan R. A comparison of symptom checklist 90—Revised profiles from patients with chronic pain from whiplash and patients with other musculoskeletal injuries. *Spine* 2001; 26:766-770.
28. Smith AD, Jull G, Schneider G, Frizzell B, Hooper RA, Sterling M. A comparison of physical and psychological features of responders and non-responders to cervical facet blocks in chronic whiplash. *BMC Musculoskeletal Dis* 2013; 14:1.
29. Styrke J, Sojka P, Björnstig U, Stålnacke BM. Symptoms, disabilities, and life satisfaction five years after whiplash injuries. *Scand J Pain* 2014; 5:229-236.

30. Côté P, Cassidy JD, Carroll L. Is a lifetime history of neck injury in a traffic collision associated with prevalent neck pain, headache and depressive symptomatology? *Acc Analysis Prev* 2000; 32:151-159.
31. Mayou R, Bryant B, Duthie R. Psychiatric consequences of road traffic accidents. *BMJ* 1993; 307:647-651.
32. Mayou R, Tyndel S, Bryant B. Long-term outcome of motor vehicle accident injury. *Psychosomatic Med* 1997; 59:578-584.
33. Pereira MJ, Jull GA, Treleaven JM. Self-reported driving habits in subjects with persistent whiplash-associated disorder: relationship to sensorimotor and psychologic features. *Arch Phys Med Rehabil* 2008; 89:1097-1102.
34. Wiles NJ, Jones GT, Silman AJ, Macfarlane GJ. Onset of neck pain after a motor vehicle accident: a case-control study. *J Rheumatology* 2005; 32:1576-1583.
